# Supplementary material
Source: publisher figshare collection journal article supplement (https://acs.figshare.com/ndownloader/files/13612736)
Supplement: Supplementary file 1 [file 13612736]

# Supporting Information

## Catalytic transfer hydrogenation of bio-based furfural with NiO nanoparticles

Jian He,<sup>a,b</sup> Leonhard Schill,<sup>b</sup> Song Yang,<sup>a,\*</sup> Anders Riisager<sup>b,\*</sup>

*<sup>a</sup> State Key Laboratory Breeding Base of Green Pesticide & Agricultural Bioengineering, Key Laboratory of Green Pesticide & Agricultural Bioengineering, Ministry of Education, State-Local Joint Laboratory for Comprehensive Utilization of Biomass, Center for Research & Development of Fine Chemicals, Guizhou University, Guiyang 550025, PR China.*

*<sup>b</sup> Centre for Catalysis and Sustainable Chemistry, Department of Chemistry, Kemitorvet Building 207, Technical University of Denmark, DK-2800 Kgs. Lyngby, Denmark.*

**(Summary of Content: 16 pages, 3 tables and 9 figures)**

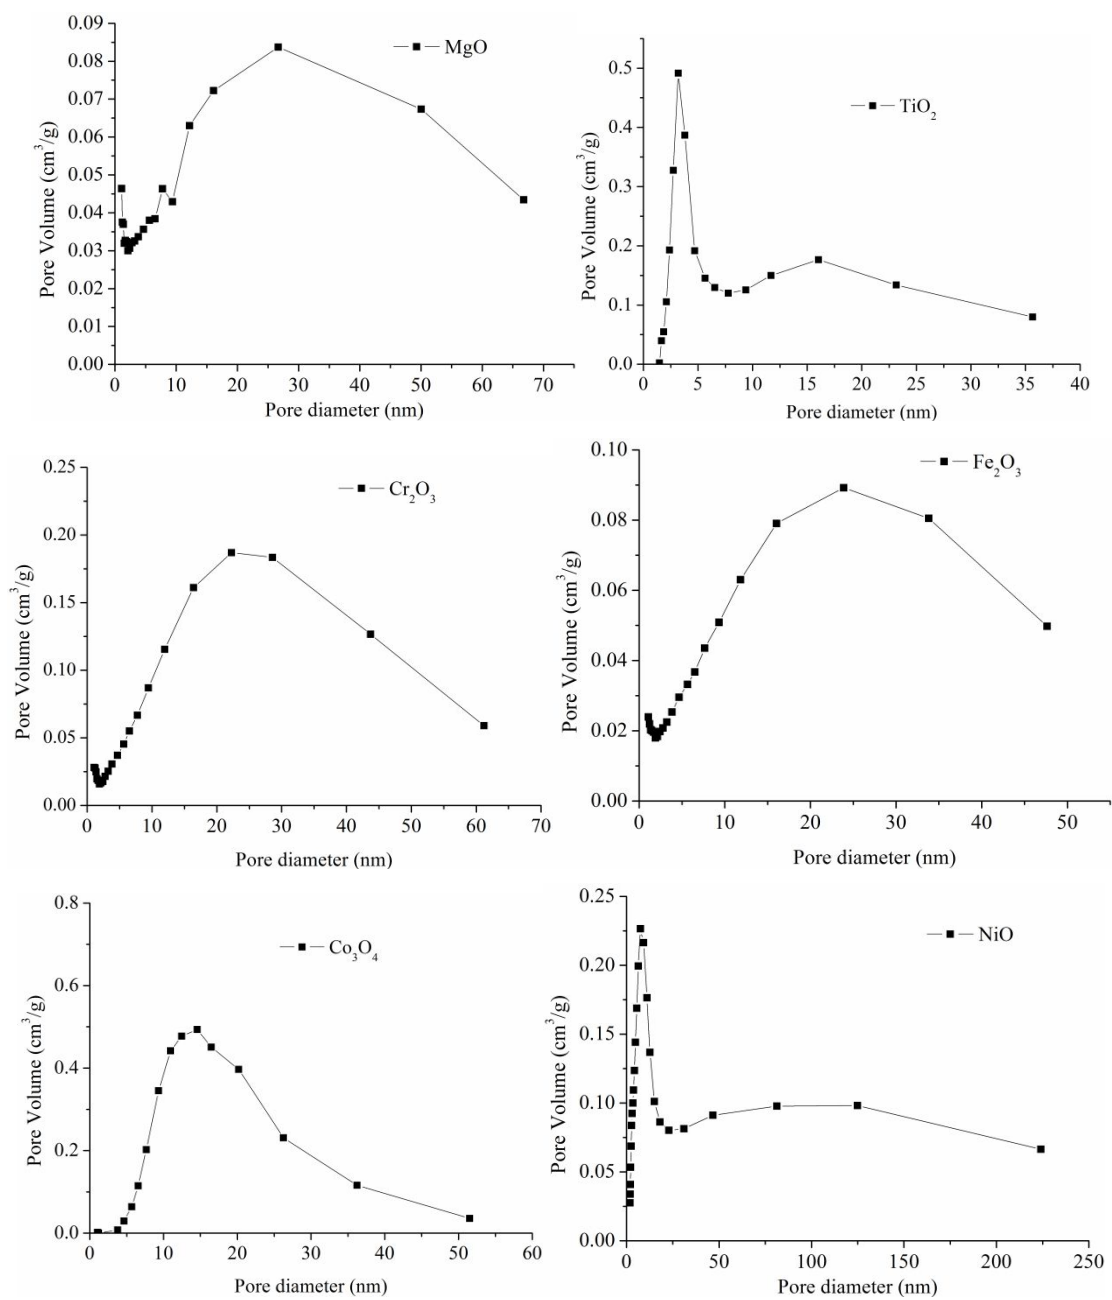

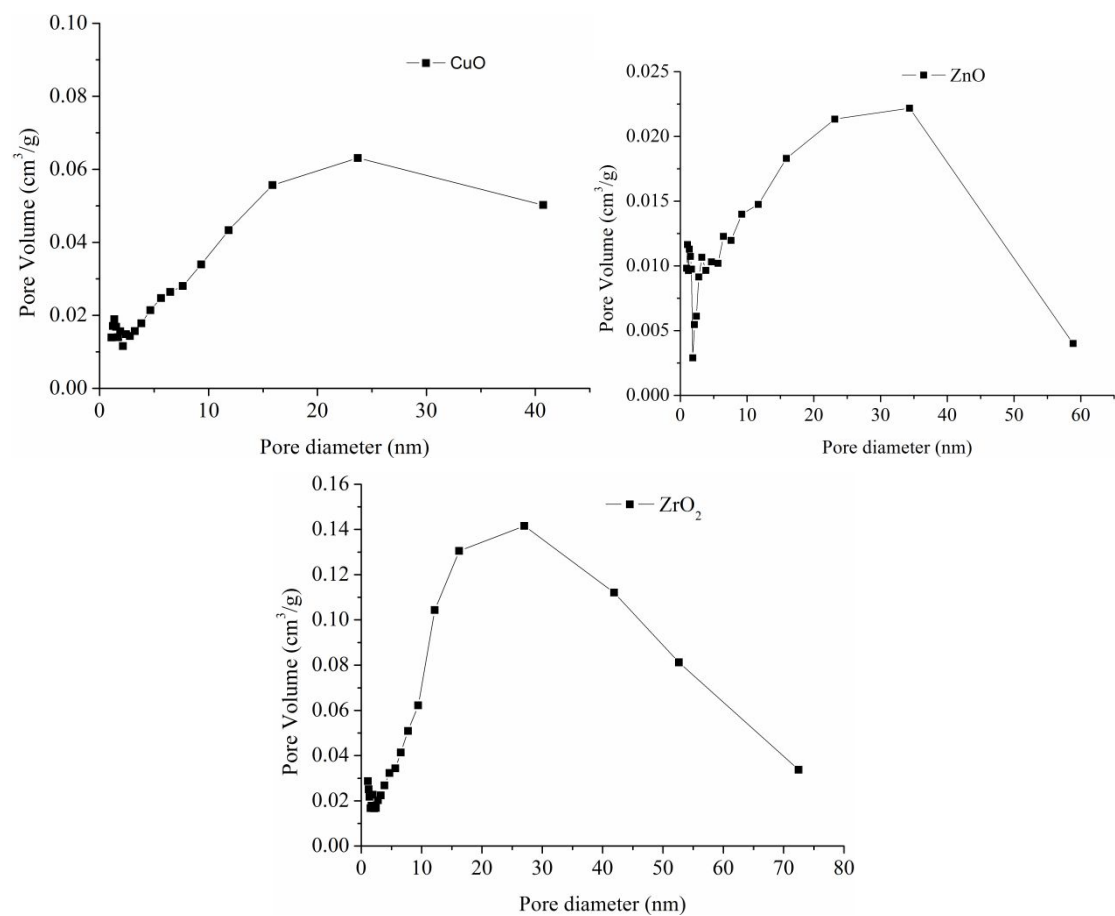

**Figure S1** Pore size distribution of different metal oxides nanoparticles.

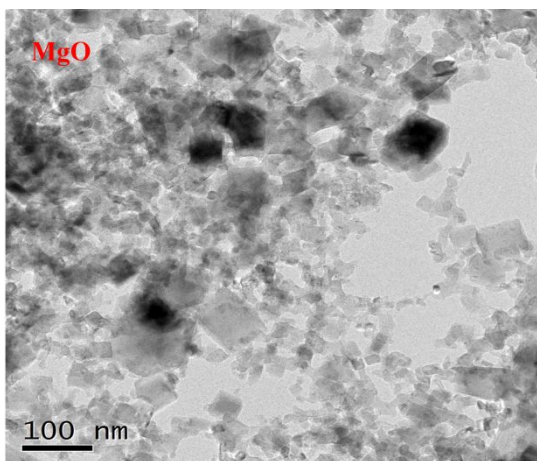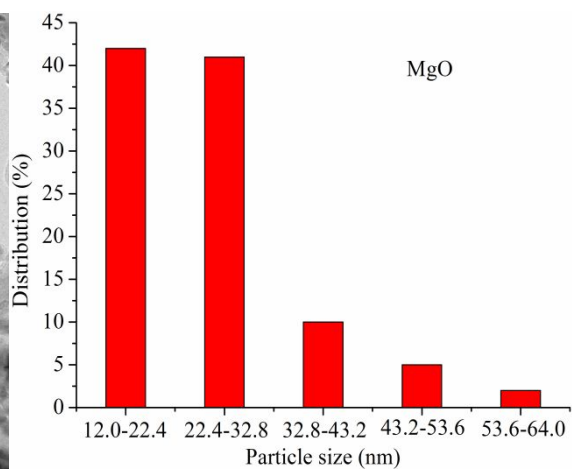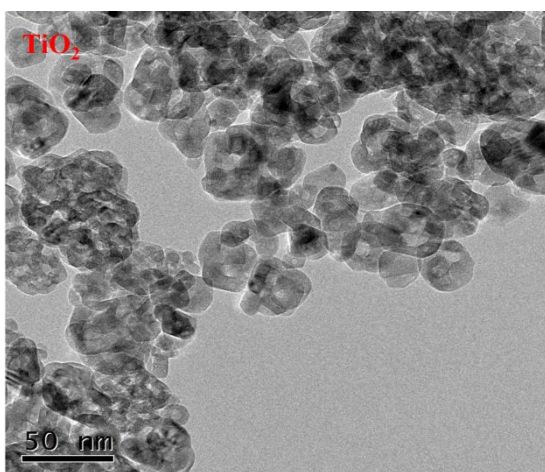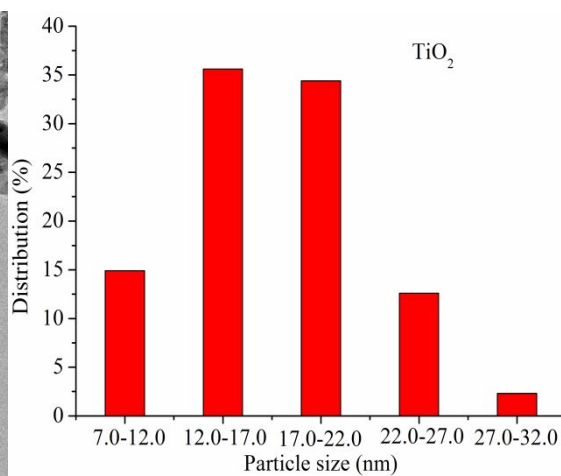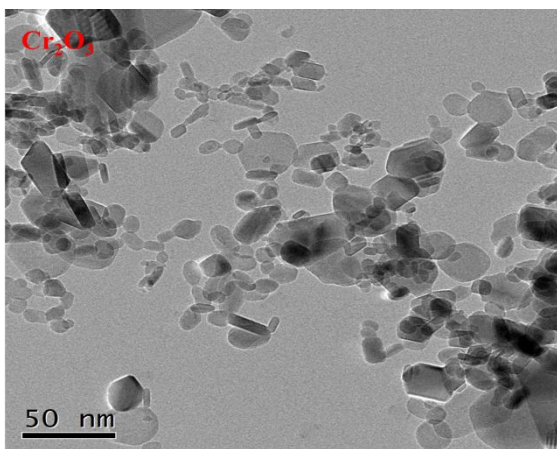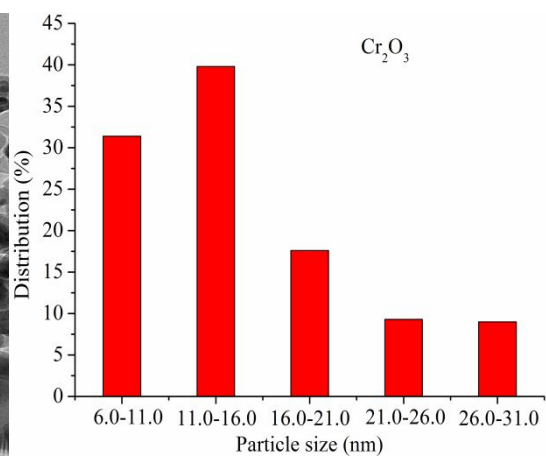

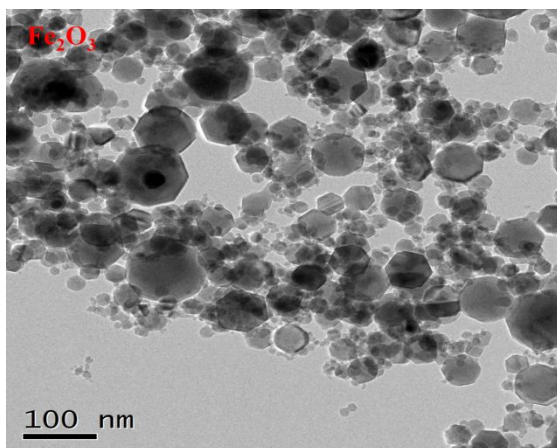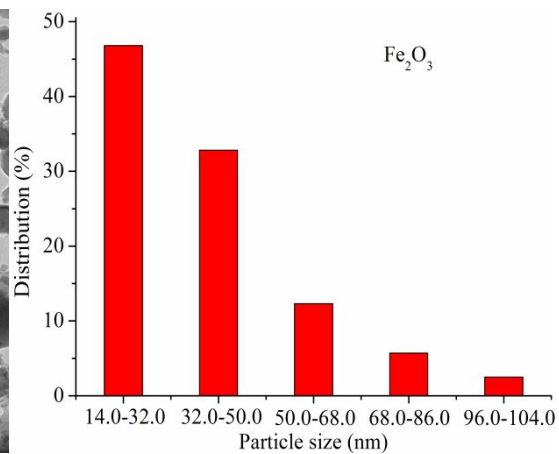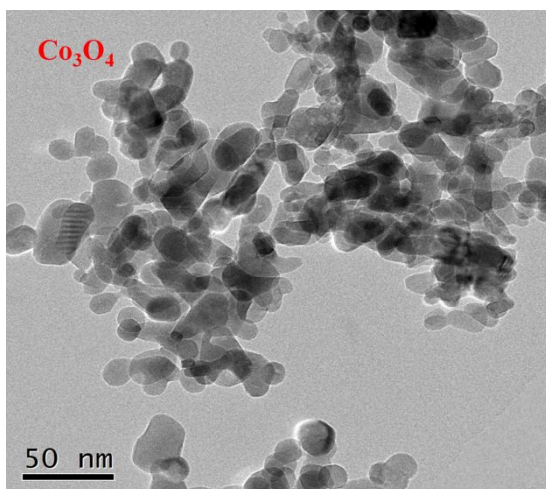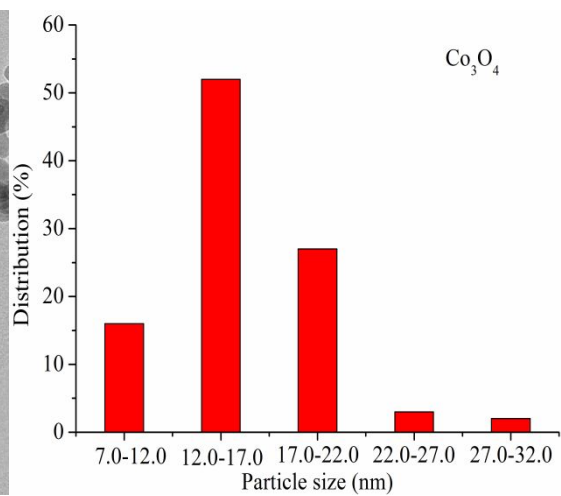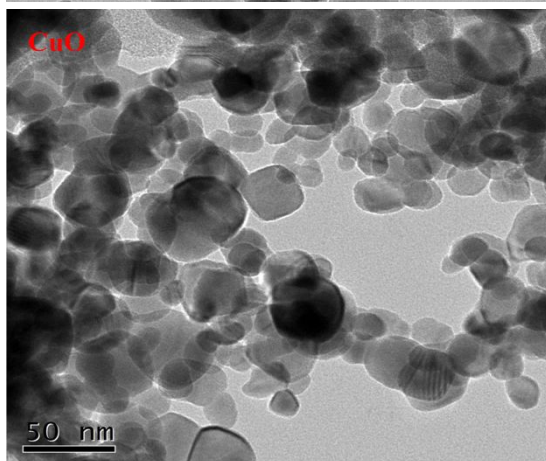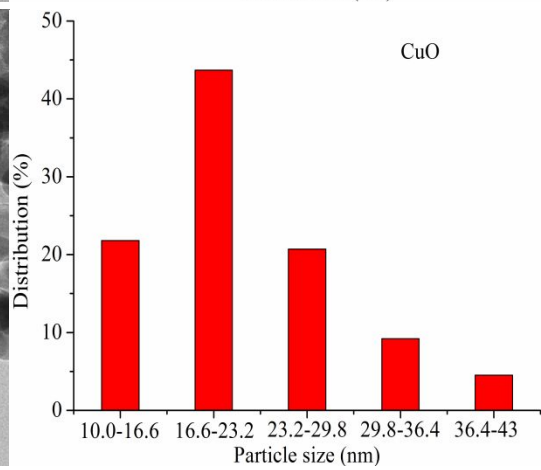

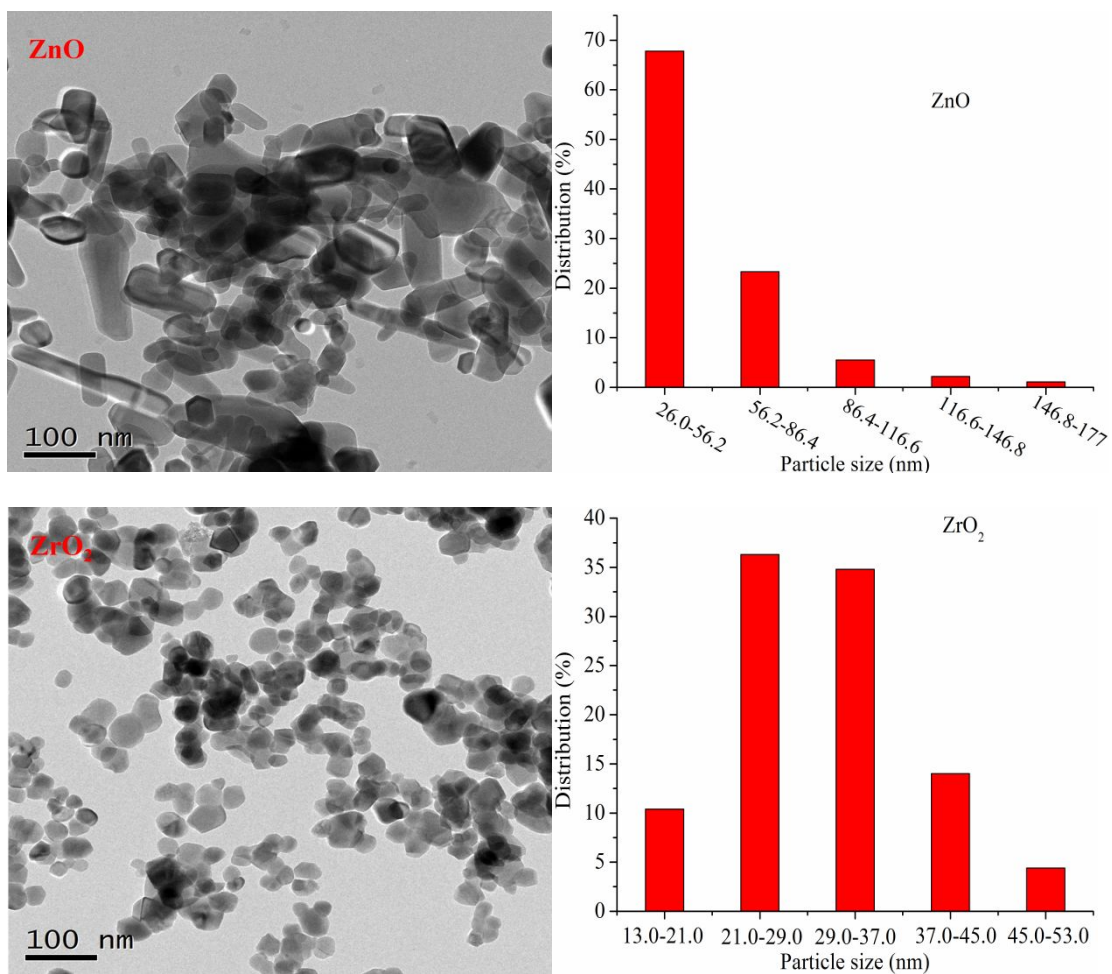

**Figure S2.** TEM images and particle size distributions of different metal oxide nanoparticles.



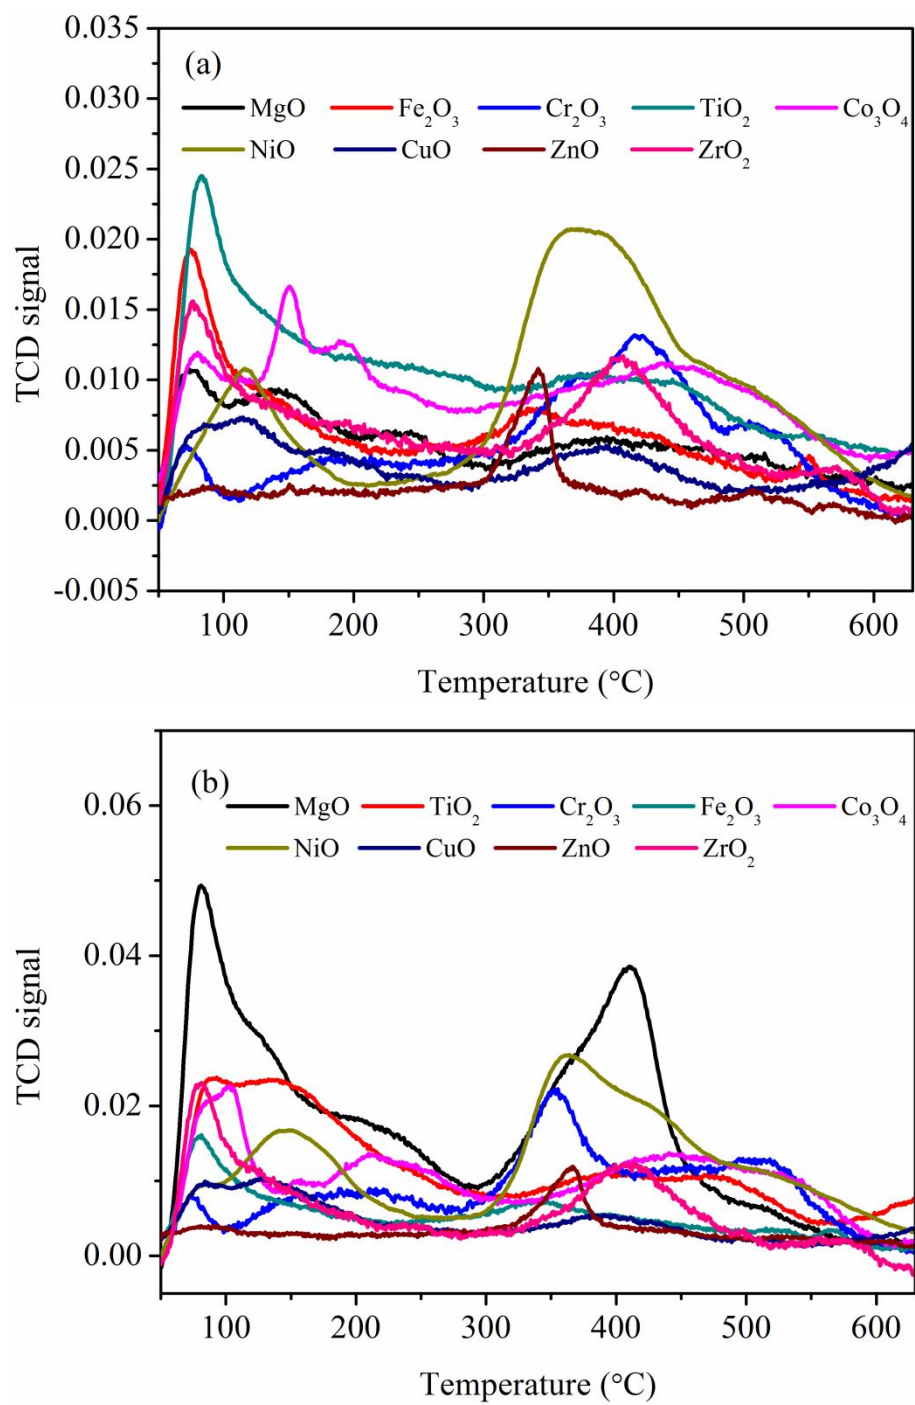

**Figure S3.** (a) NH<sub>3</sub>-TPD and (b) CO<sub>2</sub>-TPD profiles of catalysts.

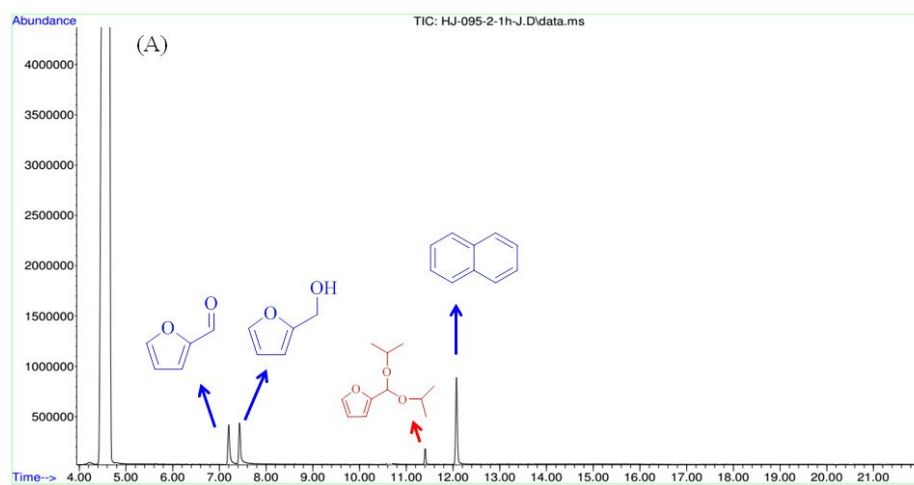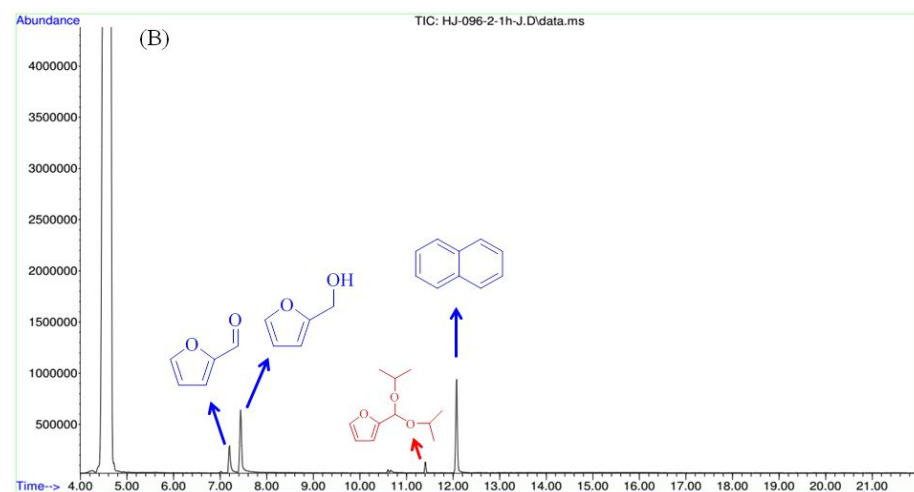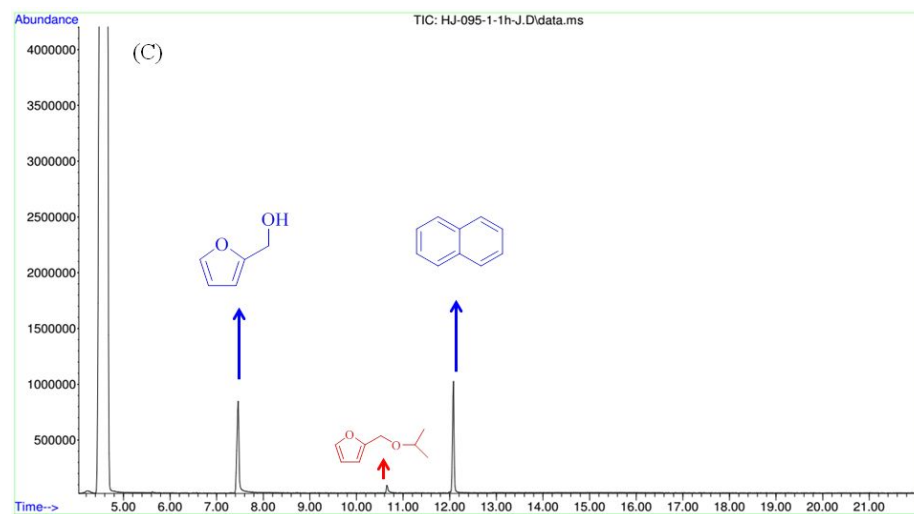



**Figure S4.** GC spectra with the main retention times (from GC-MS) of the reaction mixtures catalyzed by NiO catalyst illustrated in Table 3: (A) 130 °C, 1 h; (B) 150 °C, 1 h; (C) 170 °C, 1 h.

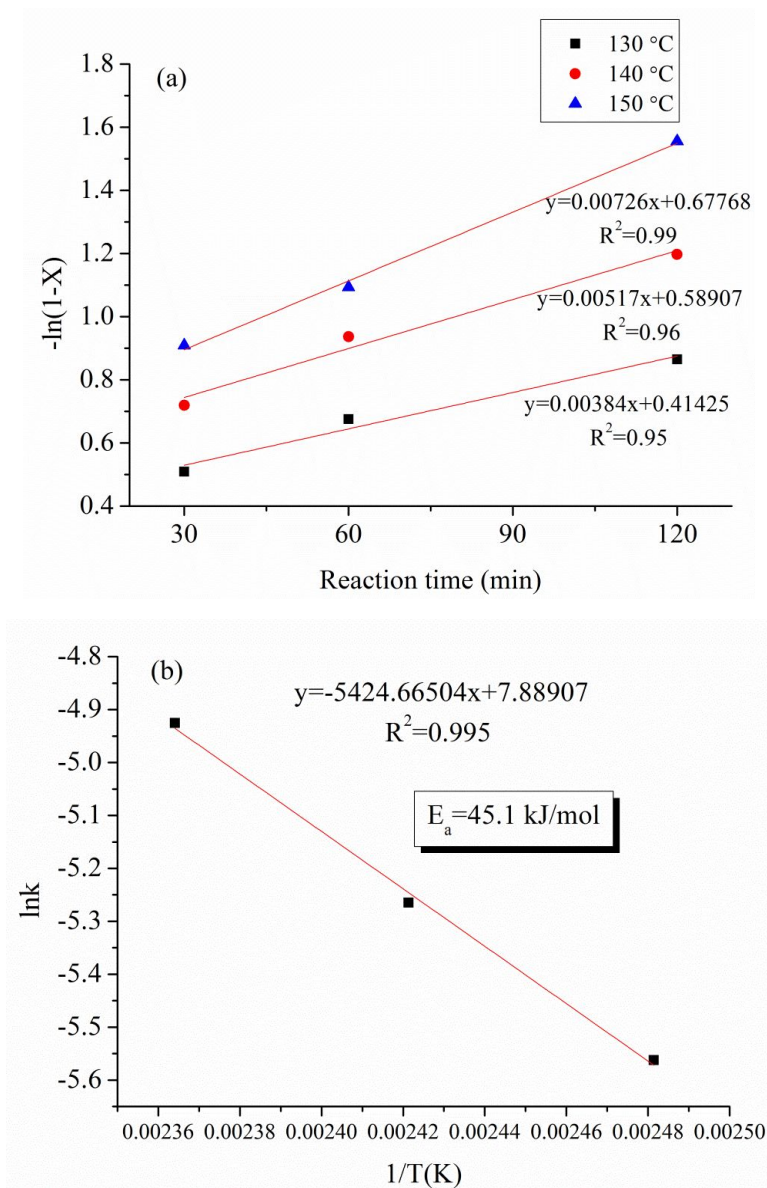

**Figure S5.** First-order kinetic fit for the CTH of FF to FAOL at (a) different temperature and (b) Arrhenius plot of conversion of FF to FAOL. Reaction conditions: FF (0.192 g, 2 mmol), NiO (0.08 g), 2-propanol (10.0 mL), 130-150 °C, 0.5-2 h.

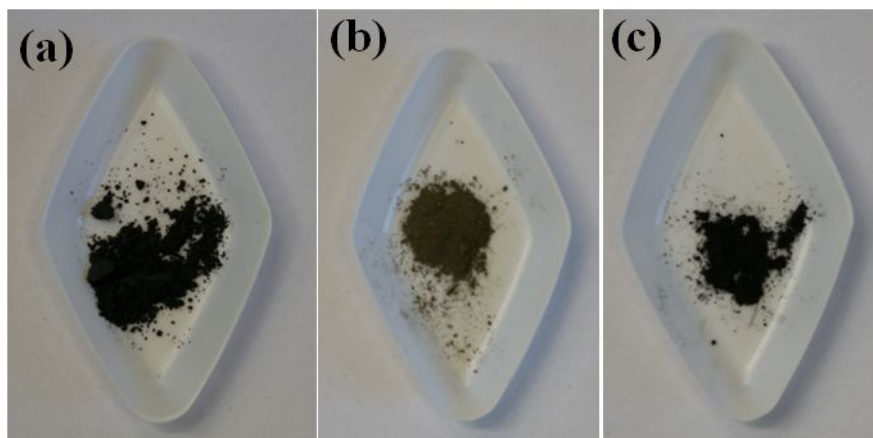

**Figure S6.** Pictures of (a) fresh, (b) used and (c) regenerated NiO catalyst.

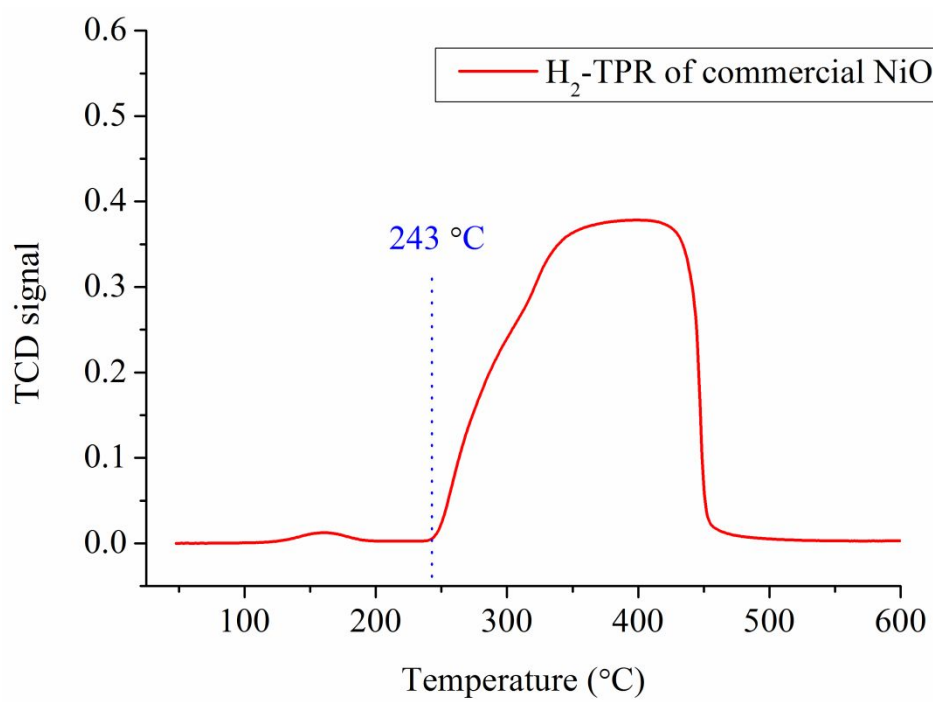

**Figure S7.** TPR profile of commercial NiO nanoparticles.

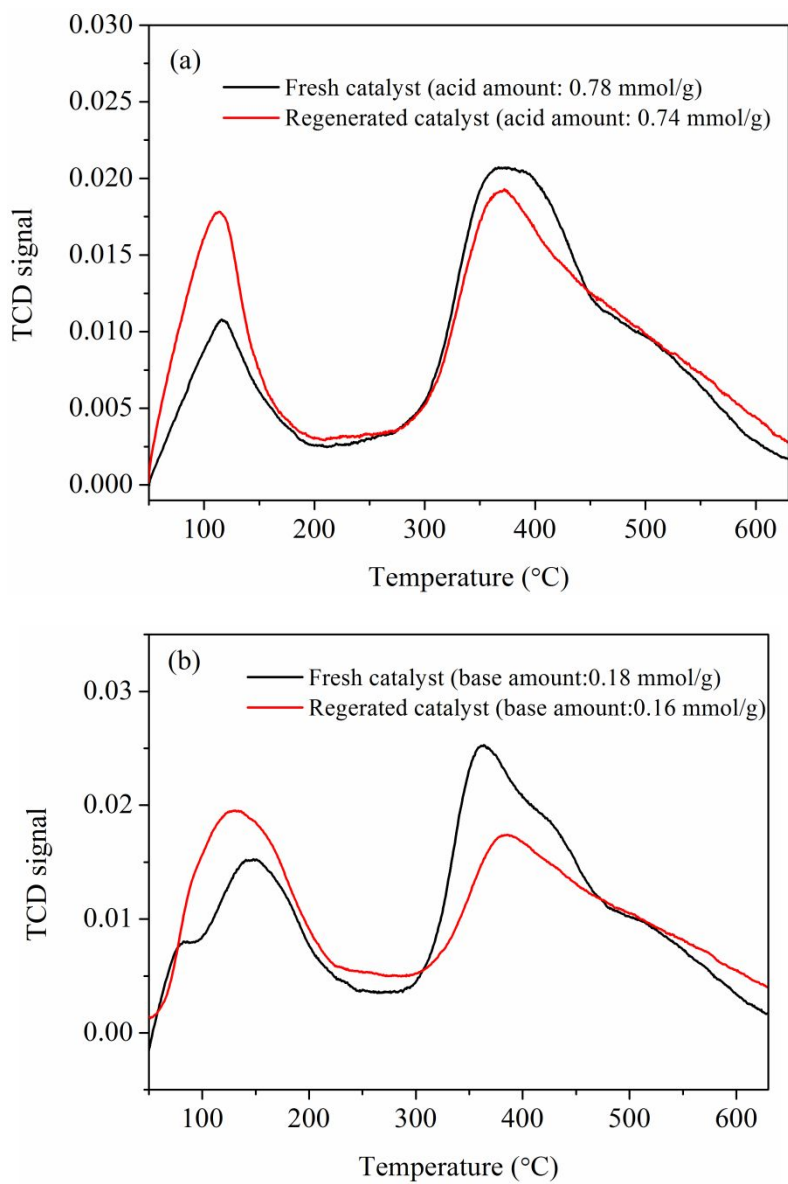

**Figure S8.** (a) NH<sub>3</sub>-TPD and (b) CO<sub>2</sub>-TPD profiles of fresh NiO catalyst and regenerated NiO catalyst after being recycled 5 times.

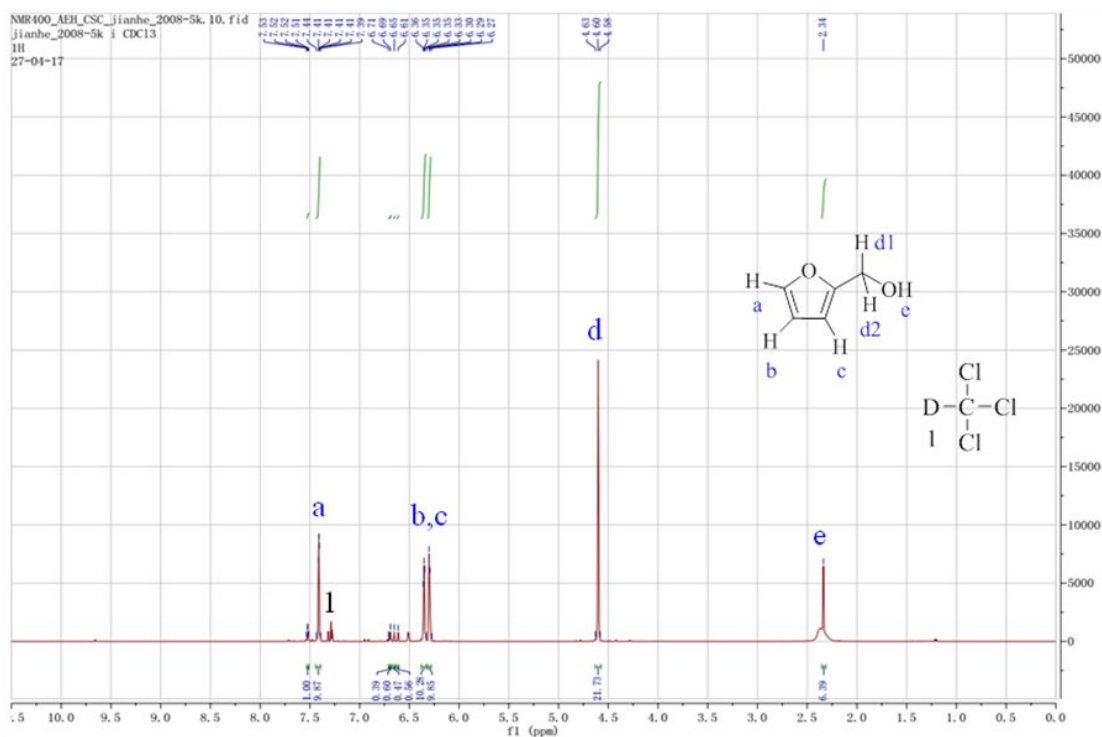

**Figure S9.**  $^1\text{H}$  NMR spectrum of the liquid product after CTH of FF and evaporation (the product was isolated by rotary evaporation at 70 °C under a reduced pressure of 50 mbar). Reaction conditions: Furfural (1.92 g), 2-propanol (25 mL), NiO catalyst (0.4 g), 170 °C, 5 h. Unmarked small peaks in the  $^1\text{H}$ -NMR spectrum are attributed to by-products.



**Table S1.** Particle size distributions of different metal oxides nanoparticles <sup>a</sup>

| Entry | Catalyst                       | Particle size (nm) | Content (%) |
|-------|--------------------------------|--------------------|-------------|
| 1     | MgO                            | 12.0-32.8          | 83.0        |
| 2     | TiO <sub>2</sub>               | 7.0-22.0           | 84.9        |
| 3     | Cr <sub>2</sub> O <sub>3</sub> | 6.0-21.0           | 88.8        |
| 4     | Fe <sub>2</sub> O <sub>3</sub> | 14.0-50.0          | 79.6        |
| 5     | Co <sub>3</sub> O <sub>4</sub> | 7.0-22.0           | 95.0        |
| 6     | NiO                            | 9.0-18.0           | 84.8        |
| 7     | CuO                            | 10.0-29.8          | 86.2        |
| 8     | ZnO                            | 26.0-56.2          | 67.8        |
| 9     | ZrO <sub>2</sub>               | 13.0-45.0          | 95.5        |

<sup>a</sup> Determined by TEM measurement.

**Table S2.** The acid and base strength distributions of different metal oxides nanoparticles

| Entry | Catalyst                       | Acid     | Acid strength distribution (%) |             | Base     | Base strength distribution (%) |             |
|-------|--------------------------------|----------|--------------------------------|-------------|----------|--------------------------------|-------------|
|       |                                | amount   | Weak                           | Moderate    | amount   | Weak                           | Moderate    |
|       |                                | (mmol/g) | (< 300 °C)                     | (300-500°C) | (mmol/g) | (< 300 °C)                     | (300-500°C) |
| 1     | MgO                            | 0.21     | 80.6                           | 19.4        | 0.65     | 58.5                           | 41.5        |
| 2     | TiO <sub>2</sub>               | 0.59     | 89.1                           | 10.9        | 0.15     | 79.4                           | 20.6        |
| 3     | Cr <sub>2</sub> O <sub>3</sub> | 0.49     | 5.1                            | 94.9        | 0.13     | 5.6                            | 94.4        |
| 4     | Fe <sub>2</sub> O <sub>3</sub> | 0.29     | 63.4                           | 36.6        | 0.07     | 64.4                           | 35.6        |
| 5     | Co <sub>3</sub> O <sub>4</sub> | 0.36     | 45.3                           | 54.7        | 0.11     | 44.4                           | 55.6        |
| 6     | NiO                            | 0.78     | 17.9                           | 82.1        | 0.18     | 35.0                           | 65.0        |
| 7     | CuO                            | 0.17     | 68.1                           | 31.9        | 0.06     | 78.0                           | 22.0        |
| 8     | ZnO                            | 0.08     | 10.0                           | 90.0        | 0.05     | 6.7                            | 93.3        |
| 9     | ZrO <sub>2</sub>               | 0.39     | 54.9                           | 45.1        | 0.12     | 64.2                           | 35.8        |

**Table S3.** CTH of FF to FAOL over ZrO<sub>2</sub> catalysts <sup>a</sup>

| Entry | Catalyst                           | FF conv. (%) | FAOL yield (%) | FAOL Select. (%) |
|-------|------------------------------------|--------------|----------------|------------------|
| 1     | ZrO <sub>2</sub> -300 <sup>b</sup> | 49.2         | 42.7           | 86.8             |
| 2     | ZrO <sub>2</sub> -500 <sup>b</sup> | 29.4         | 23.5           | 80.0             |

<sup>a</sup> Reaction conditions: 2 mmol FF, 0.06 g catalyst, 10 mL 2-propanol, 150 °C, 1 h. <sup>b</sup> Zirconium dioxide was prepared by precipitation method and then calcined at 300 °C or 500 °C for 4 h, respectively.
